# Supplementary material for: Nociception and pain in humans lacking a functional TRPV1 channel
Source: JCI journal article supplement (doi:10.1172/jci153558), 2022-12-01
Supplement: sd1 [file 1]

**Supplemental Information for**  
**Nociception and pain in humans lacking functional TRPV1 channel**

Ben Katz<sup>1†</sup>, Rachel Zaguri<sup>1†</sup>, Simon Edvardson<sup>2†</sup>, Channa Maayan<sup>2</sup>, Orly Elpeleg<sup>3</sup>, Shaya Lev<sup>1</sup>, Elyad Davidson<sup>4</sup>, Maximilian Peters<sup>1</sup>, Shlomit Kfir-Erenfeld<sup>5</sup>, Esther Berger<sup>6</sup>, Shifa Ghazalin<sup>1</sup>, Alexander M. Binshtok<sup>1\*</sup> and Baruch Minke<sup>1\*</sup>

\*Corresponding authors: Email: baruch.minke@mail.huji.ac.il (B.M.);  
alexander.binshtok@mail.huji.ac.il (A.M.B.)

**This PDF file includes:**

Supplementary Methods

Supplemental Figures 1 to 9

Supplemental Tables 1 to 2

## **Supplementary Methods:**

### **RNA isolation from Human PBMC:**

Peripheral blood (10 mL), obtained from 5 donors (3 men and 2 women) and from A1 were collected in sterile heparin tubes (6-455084, De-Groot). The blood was diluted with PBS (1:1) and the PBMCs were separated by centrifugation over Histopaque (10771, Sigma-Aldrich) at 400g for 30 minutes at 20°C. The mononuclear layer, consisting predominantly of lymphocytes, was collected and centrifuged at 160g for 10 minutes at 20°C. The pellet was resuspended in 10 mL of PBS and then centrifuged at 160g for 10 minutes at 20°C. The pellet was finally resuspended in 1 mL TriReagent (00901023310, Bio-Lab) and RNA was extracted according to the manufacturer's instructions. The concentration of RNA was measured, and samples were stored at -20°C until use.

### **Quantification of gene expression by real-time reverse transcription:**

1 µg of RNA (pretreated with DNase I kit (AMPD1, Sigma)) was used to generate cDNA using the High-Capacity cDNA reverse-transcription Kit containing RNase inhibitor (AB-4374966, Thermo-Fisher scientific). A TaqMan Gene Expression Assay (Applied Biosystems) for *TRPV1* (Hs00218912\_m1) was used to measure mRNA expression levels relative to the endogenous reference gene, *GAPDH* (4333764F). Measurements were performed using StepOnePlus Real-Time PCR (4376600, Thermo-Fisher scientific). Each reaction was performed in triplicate and was accompanied by a negative control in which the RNA was replaced by nuclease-free water. Comparative threshold cycle ( $C_T$ ) was used to calculate differential mRNA.  $\Delta C_T$  values were calculated as the difference between the mean  $C_T$  values for *TRPV1* and the mean  $C_T$  values for *GAPDH* ( $\overline{C_{T,TRPV1}} - \overline{C_{T,GAPDH}}$ ).  $\Delta\Delta C_T$  values were calculated as the difference between  $\Delta C_T$  values and the mean  $\Delta C_T$  value of healthy volunteers. Data are presented as fold change ( $2^{-\Delta\Delta C_T}$ ).

### **TRPV1 Exome sequencing:**

Genomic DNA was extracted from the blood using VERSAGENETM DNA Purification Kit (Gentra, Minneapolis, MN). The *TRPV1* genomic DNA was fragmented into several pieces which overlapped partially with the contiguous regions by PCR primers. Sequences of the DNA fragments were assembled into the whole *TRPV1* gene, after sequencing. First strand cDNA was synthesized with Superscript<sup>TM</sup> (Invitrogen). The genomic DNA or cDNA fragments were amplified by PCR using EF-Taq DNA polymerase (SolGent, Daejeon, South Korea). The PCR product which was purified with the QIAquick PCR purification kit (QIAGEN, Valencia, CA) was cloned into TOPO TA vector (Invitrogen). Single-pass sequencing was performed in an ABI 3730xl sequencer (Applied Biosystems), following the manufacturers' protocols.

### **Exome Analysis:**

Exonic sequences from DNA samples of the index case were enriched with the SureSelect Human All Exon 50 Mb V.5 Kit (Agilent Technologies, Santa Clara, California, USA). Sequences (125-bp paired-end) were generated on a HiSeq2500 (Illumina, San Diego, California, USA). Read alignment and variant calling were performed with DNAnexus (Palo Alto, California, USA) using default parameters with the human genome assembly hg19 (GRCh37) as reference. Parental consent was given for genetic studies. The study was performed with the approval of the ethical committees of Hadassah Medical Center and the Israeli Ministry of Health.

### **Whole exome sequencing (WES) and exome analysis:**

WES of A1 was performed as follows: Exonic sequences from DNA sample of the index case were enriched with the SureSelect Human All Exon 50 Mb V.5 Kit (Agilent Technologies,

Santa Clara, California, USA). Sequences (125-bp paired-end) were generated on a HiSeq2500 (Illumina, San Diego, California, USA). Read alignment and variant calling were performed with DNAnexus (Palo Alto, California, USA) using default parameters with the human genome assembly hg19 (GRCh37) as reference. The analysis yielded 64.1 million mapped reads with a mean coverage of 114X. Following alignment and variant calling, a series of filtering steps was performed. These included removing variants which were called less than 8X, were off-target, heterozygous, synonymous, had minor allele frequency (MAF)>0.5% at ExAC or MAF>1% at the Hadassah in-house database (approximately 900 ethnic-matched exome sequences).

WES of A2, E13 and E14 was performed as follows: exonic sequences was performed as recently described (PMID: 34514401). The analysis yielded 56.9, 75 and 89 million mapped reads, with a mean coverage of 90X, 116X and 137X and 94.7%, 95.03% and 95.3% over 20X, respectively. Following alignment and variant calling, a series of filtering steps was performed. These included removing variants which were exonic and splice-site, non-synonymous variants using GERP>2.0, heterozygous and had MAF>0.2% at GnomAD or MAF>1% at the Hadassah in-house database (comprised of 11,000 WES). The study was performed with the approval of the ethical committees of Hadassah Medical Center and the Israeli Ministry of Health.

### **Taste experiment:**

Square 10x10 mm gauze pads were soaked in solution containing a tastant or spices, each at 5 different concentrations (except for capsaicin which was given at an additional higher concentration to the affected individuals). The pads were moved on the anterior part of the tongue and mouth. The tastants were applied in ascending order and minimum recognition threshold was measured. Sodium chloride (793566), sucrose (S0839), citric acid (C0759),

quinine hydrochloride (822194), cinnamaldehyde (W228613), menthol (M2780), capsaicin (M2028). All chemicals were purchased from Sigma-Aldrich.

The taste experiments were performed with prior knowledge of the genotype.

### **Histamine test:**

A volume of 0.05 mL of histamine bisphosphate monohydrate (H7375, Sigma-Aldrich) dissolved in DDW at 1:1000 w/v and 1:10,000 w/v was injected intracutaneously into the forearm of A1 using a needle (25G, BD Microlance). DDW was used as vehicle. Images were processed for the extent of the flare using an imaging tool (Magic wand, tolerance 5, Adobe Photoshop) for detecting areas of similar tone and color.

### **Skin biopsy and immunohistochemistry:**

Skin sample was collected from the bottom part of the leg adjacent to the ankle using a skin biopsy Punch 3 mm x 10 (Integra industries, NY, USA) after anesthetizing the area using Esmolone injection 1% (Lidocaine Hydrochloride 10 mg/mL solution, Rafa industries LTD, Jerusalem, Israel). The skin biopsy was put into 4% paraformaldehyde in PBS for 24 hours before further processed. Immunohistochemistry was performed on deparaffinized 4 µm sections of paraffin-embedded tissue blocks. The detection was done using an anti-PGP9.5 antibody (Z5116, Dako Denmark) diluted to a titer of 1:150, and Ultra View DAB Detection Kit, running on an automated system (Ventana BenchMark Ultra Autostainer, Tucson, AZ, USA). 3,3'-Diaminobenzidin (DAB) was used as chromogen. All sections were counterstained with Mayers hematoxylin. Images were taken using CCD digital camera (ORCA-ER, Hamamatsu) controlled by SimplePCI software (Hamamatsu, Version 6.1) mounted on an Axioskop (Zeiss) microscope with x20/0.45 achrostat (Zeiss) objective.

**Medical inquiry:**

All medical inquiries were performed by a physician in the presence of a hebrew-arabic translator with a medical background. The medical inquiry of the children was performed in the presence of the parents and answers were given by the children and their parents. For the affected individual A2, the mother of the child answered the medical inquiry and therefore some of her answers were considered as “impressions”.

**Sequence alignment:**

We performed the multiple sequence alignment using Geneious Alignment within the Geneious Prime (2020.2.2) software using the default parameters (cost matrix: Blosum62) in Global alignment mode. Consensus sequence threshold was set to 100%-identity. Numbering is according to hTRPV1.

**Software:**

Zen 3.5 (blue edition, Zeiss); Geneious Prime (2020.2.2); Clampex (10.7.0.3) and Clampfit (11.1.0.23, Molecular Devices); NIS-elements Ar (4.50, Nikon), OriginPro 2017 (64bit, SR2 b9.4.2.380, OriginLab), CorelDRAW and CorelPHOTO-PAINT 2018 (20.0.0.633), Photoshop CC (20.0.7, Adobe), Prism 8 for macOS (8.4.0), IBM SPSS Statistics (26.0.0.1), Word and Excel 2019 MSO (16.0.10363.20015, Microsoft) 64-bit.

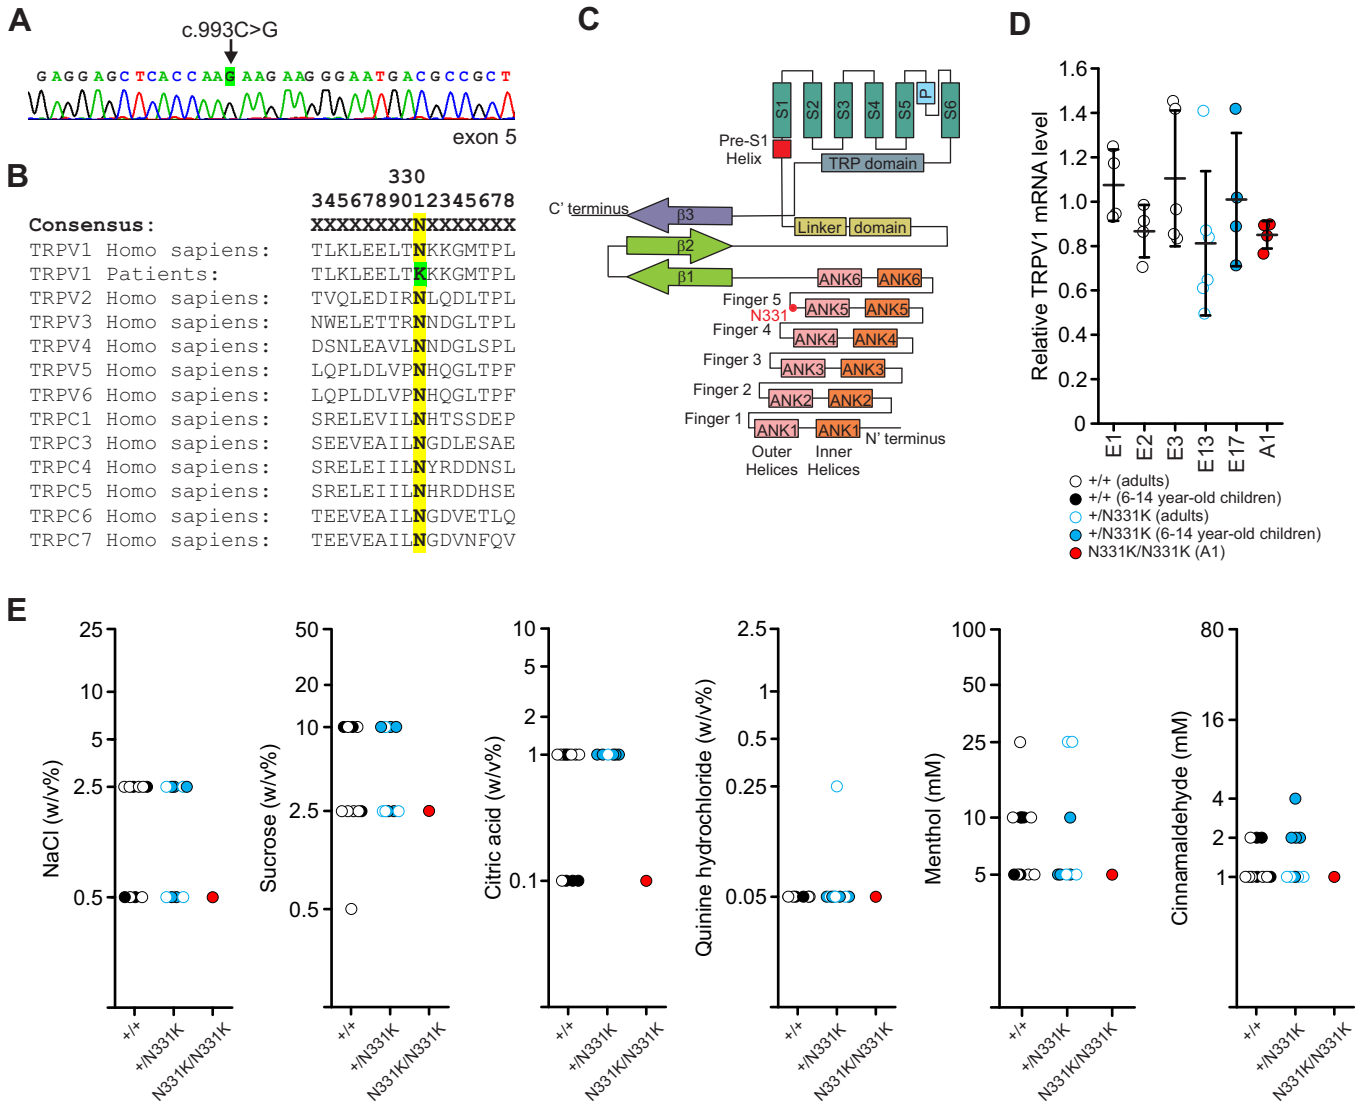

**Supplemental Figure 1. Expression levels of TRPV1 mRNA and recognition threshold of basic tastants.** (A) Exon sequencing of the *TRPV1* gene of A1 (shown) and A2 revealed a single nucleotide substitution, C993G in exon 5 of the *TRPV1* gene. (B) Sequence alignment showing the conservation of asparagine (N, yellow) residue in all channel members of the human TRPV and TRPC subfamilies. (C) A scheme of the protein domains of TRPV1 showing the location of the missense mutation. Ankyrin-repeat domains (ANK); transmembrane domain (S); Pore domain (P). (D) Relative *TRPV1* mRNA levels obtained from PBMCs of healthy volunteers (black,  $n_{+/+}^{E1} = 4$ ,  $n_{+/+}^{E2} = 4$ ,  $n_{+/+}^{E3} = 5$ ), heterozygote family members (cyan,  $n_{+/N331K}^{E13} = 6$ ,  $n_{+/N331K}^{E17} = 4$ ) and A1 (red,  $n_{N331K/N331K} = 4$  repeats) were determined by quantitative real time PCR (error bars indicate SD). (E) Recognition thresholds to NaCl (responded to the compound as “salty”), sucrose (responded to the compound as “sweet”), citric acid (responded to the compound as “sour”), quinine hydrochloride (responded to the compound as “bitter”), menthol (TRPM8 activator, responded to the compound as “mint”) and cinnamaldehyde (TRPA1 activator, responded to the compound as “cinnamon”,  $n_{+/+} = 13$ ,  $n_{+/N331K} = 9$ ,  $n_{N331K/N331K} =$  minimum of 3 repeats).



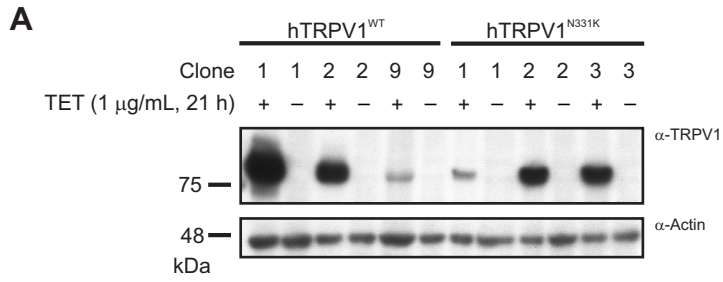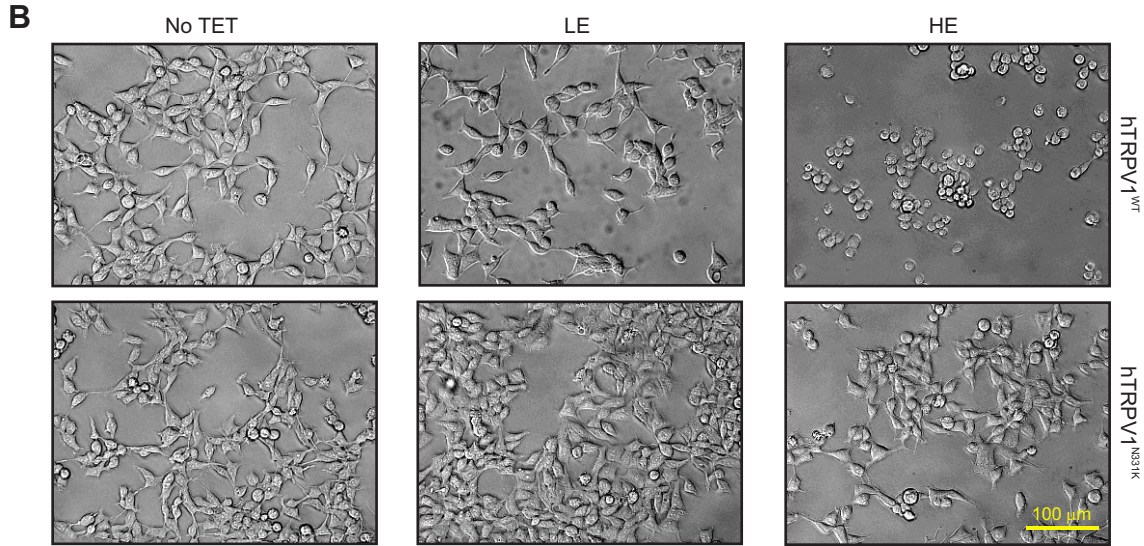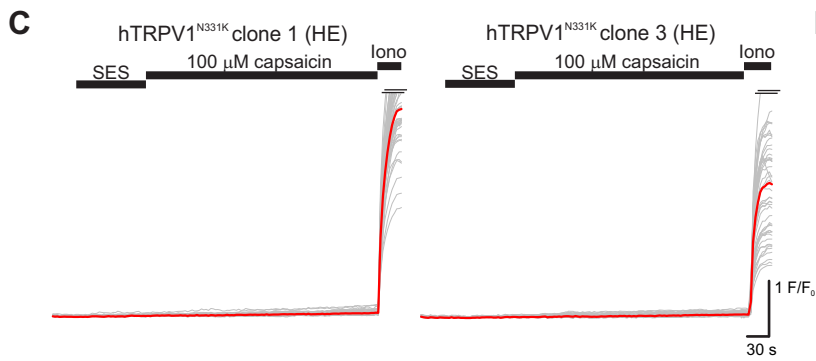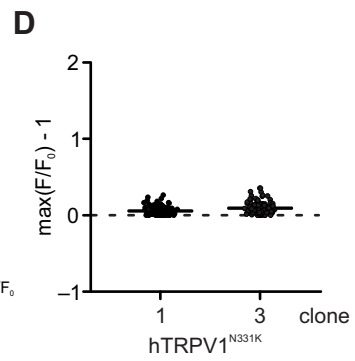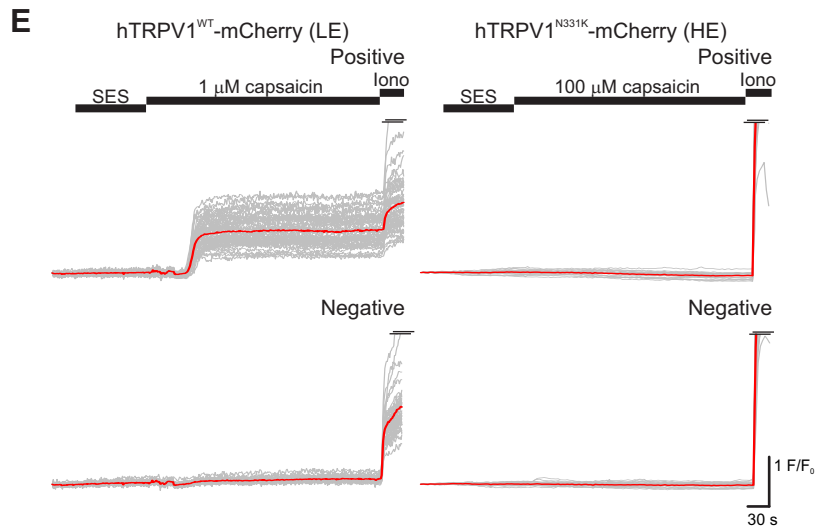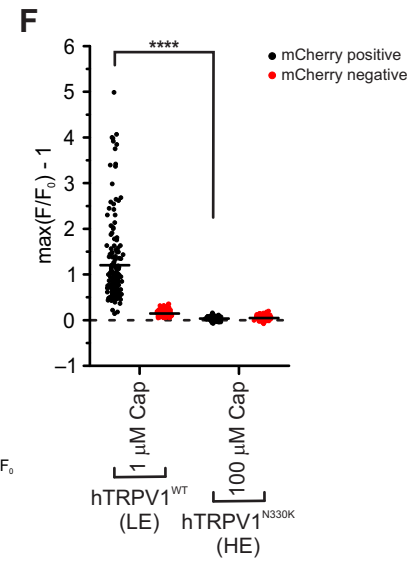

**Supplemental Figure 2. hTRPV1<sup>N331K</sup> stably and transiently expressed in T-REx-293 cell line is nonfunctional.** (A) Western-blot analysis of T-REx-293 cells stably expressing different clones of hTRPV1<sup>WT</sup> or hTRPV1<sup>N331K</sup> using an anti-TRPV1 antibody. Anti-actin antibody was used as protein loading control ( $n = 3$ ). Clones 2 of T-REx-293 cells stably expressing hTRPV1<sup>WT</sup> or hTRPV1<sup>N331K</sup> were selected for the experiments of Figures 2, 3, 6C, 7 and Supplemental Figure 3. (B) Photographs of T-REx-293 cells stably expressing hTRPV1<sup>WT</sup> or hTRPV1<sup>N331K</sup> at various doses and duration of TET incubation. Note that T-REx-293 cells stably expressing hTRPV1<sup>WT</sup> show major change in morphology (round shape, right) after incubation with 1  $\mu\text{g}/\text{mL}$  TET for 21 hours, which was not observed in T-REx-293 cells stably expressing hTRPV1<sup>N331K</sup> (scale bar:100  $\mu\text{m}$ , the scale bar is applicable to all panels). (C) Representative traces of Fura-2 based  $\text{Ca}^{2+}$  imaging from T-REx-293 cell lines stably expressing hTRPV1<sup>N331K</sup> clone 1 (left) or hTRPV1<sup>N331K</sup> clone 3 (right) in response to application of 100  $\mu\text{M}$  capsaicin. Application of the  $\text{Ca}^{2+}$  ionophore ionomycin (Iono) served as a positive control. (D) Maximal (max) normalized fluorescence changes from baseline during application of 100  $\mu\text{M}$  capsaicin (Cap): hTRPV1<sup>N331K</sup> HE, clone 1, 100  $\mu\text{M}$  Cap ( $N = 4$  plates,  $n = 165$  cells) and hTRPV1<sup>N331K</sup> HE, clone 3, 100  $\mu\text{M}$  Cap ( $N = 4$ ,  $n = 157$ ). (E) Representative traces of Fura-2 based  $\text{Ca}^{2+}$  imaging from T-REx-293 cell lines transiently transfected with hTRPV1<sup>WT</sup>-mCherry at LE levels (left) and hTRPV1<sup>N331K</sup>-mCherry at HE levels (right) in response to application of 1  $\mu\text{M}$  or 100  $\mu\text{M}$  capsaicin, respectively. Upper traces are mCherry positive cells (Positive) and lower traces are mCherry negative cells (Negative). Application of the  $\text{Ca}^{2+}$  ionophore ionomycin served as a positive control. (F) Maximal (max) normalized fluorescence change from baseline during application of 1  $\mu\text{M}$  capsaicin: hTRPV1<sup>WT</sup> LE, mCherry positive, 1  $\mu\text{M}$  Cap ( $N = 6$ ,  $n = 169$ ), hTRPV1<sup>WT</sup> LE, mCherry negative, 1  $\mu\text{M}$  Cap ( $N = 6$ ,  $n = 227$ ) and 100  $\mu\text{M}$  capsaicin: hTRPV1<sup>N331K</sup> HE, mCherry positive, 100  $\mu\text{M}$  Cap ( $N = 4$ ,  $n = 102$ ), hTRPV1<sup>N331K</sup> HE, mCherry negative, 100  $\mu\text{M}$  Cap ( $N = 4$ ,  $n = 124$ ). \*\*\*\*P < 0.0001 by 2-tailed Student's *t*-test.

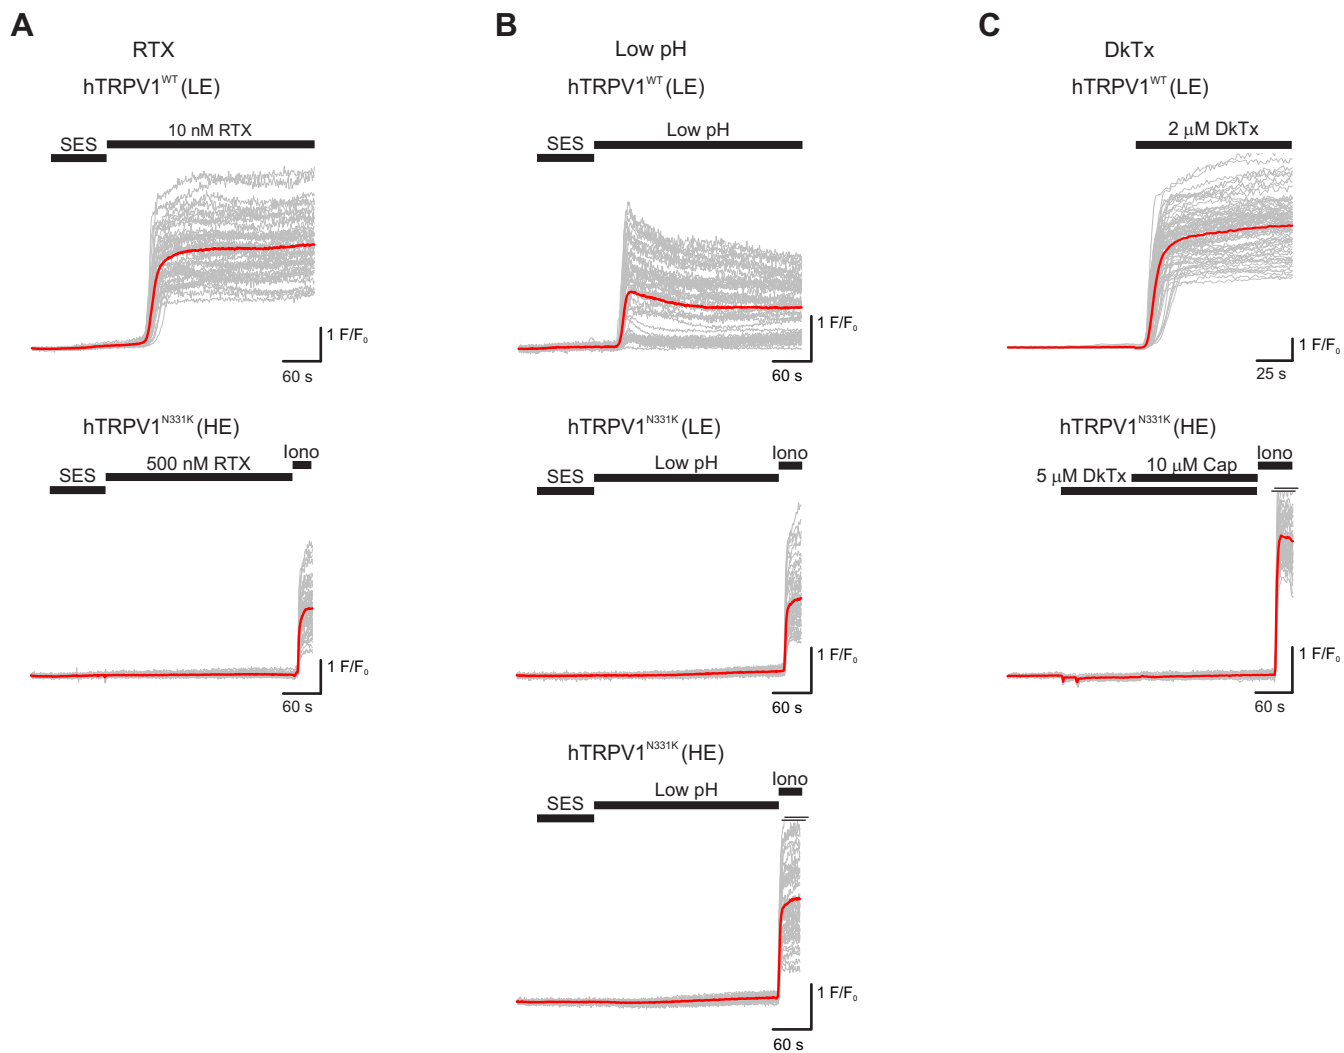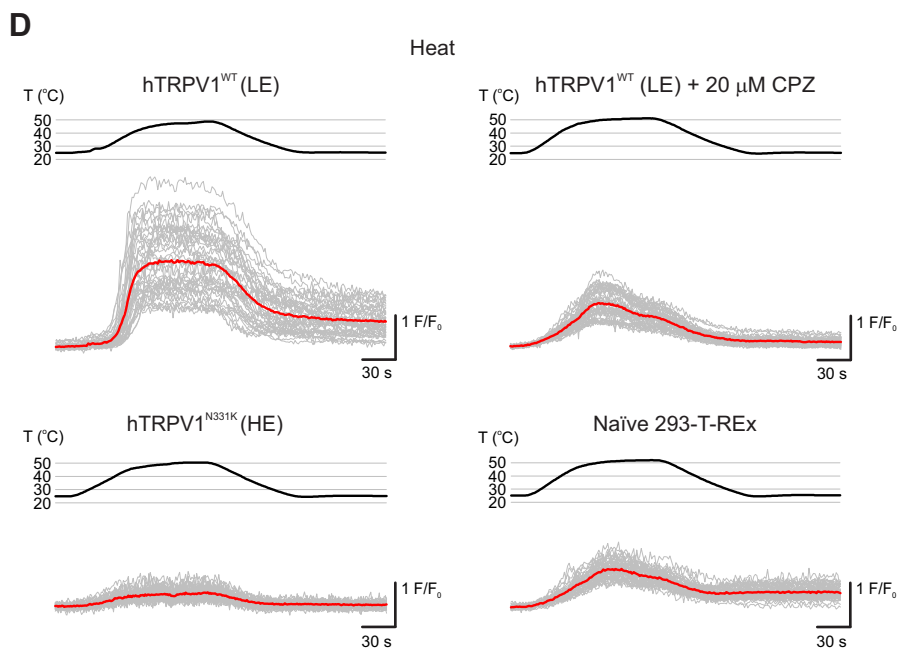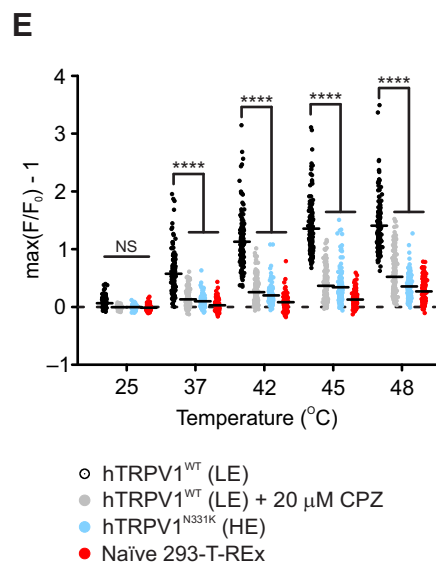

**Supplemental Figure 3. The N331K mutation renders the TRPV1 channel**

**nonfunctional. (A-D)** Representative traces of Fura-2 based  $\text{Ca}^{2+}$  imaging from T-REx-293 cell lines stably expressing hTRPV1<sup>WT</sup> at LE levels, hTRPV1<sup>N331K</sup> at LE or HE levels in response to various TRPV1 agonists. **(A)** hTRPV1<sup>WT</sup>, LE, 10 nM RTX (top), hTRPV1<sup>N331K</sup>, HE, 500 nM RTX (bottom); **(B)** hTRPV1<sup>WT</sup> LE, low pH (top), hTRPV1<sup>N331K</sup> LE, low pH (middle), hTRPV1<sup>N331K</sup> HE, low pH (bottom); **(C)** hTRPV1<sup>WT</sup> LE, 2  $\mu\text{M}$  DkTx (top), hTRPV1<sup>N331K</sup> HE, 5  $\mu\text{M}$  DkTx plus 10  $\mu\text{M}$  Cap (bottom); **(D)** hTRPV1<sup>WT</sup> LE, heat (top left), hTRPV1<sup>WT</sup> LE incubated with 20  $\mu\text{M}$  Capsazepine (CPZ), heat (top right), hTRPV1<sup>N331K</sup> HE, heat (bottom left), naïve T-Rex-293, heat (bottom right). Application of the  $\text{Ca}^{2+}$  ionophore ionomycin (Iono) served as a positive control. **(E)** Maximal (max) normalized fluorescence change from baseline during heat ramp from 25 to 50°C at various temperatures: hTRPV1<sup>WT</sup> LE, heat ( $N = 4$  plates,  $n = 155$  cells), hTRPV1<sup>WT</sup> LE incubated with 20  $\mu\text{M}$  CPZ, heat ( $N = 3$ ,  $n = 155$ ), hTRPV1<sup>N331K</sup> HE, heat ( $N = 6$ ,  $n = 155$ ), Naïve T-REx-293, heat ( $N = 6$ ,  $n = 155$ ). \*\*\*\* $P < 0.0001$  and NS – non-significant  $P > 0.05$ , by 2-way ANOVA with Bonferroni's multiple comparisons test.

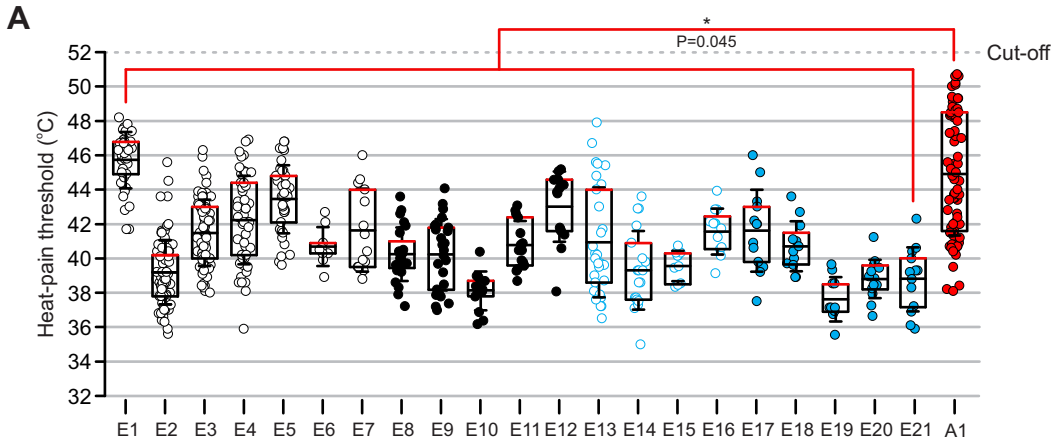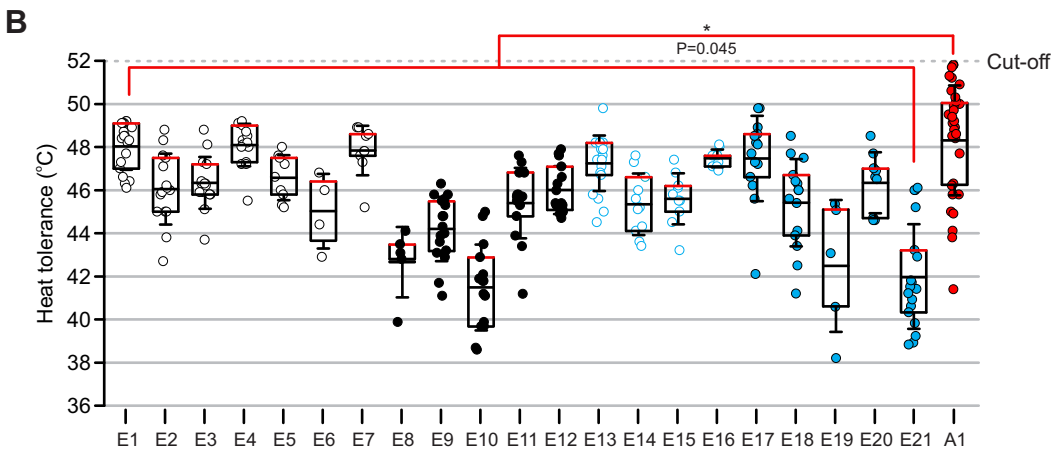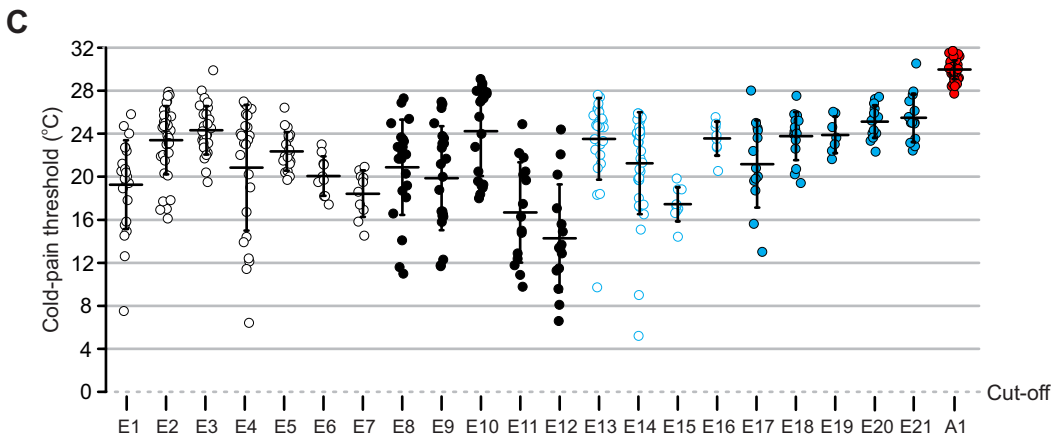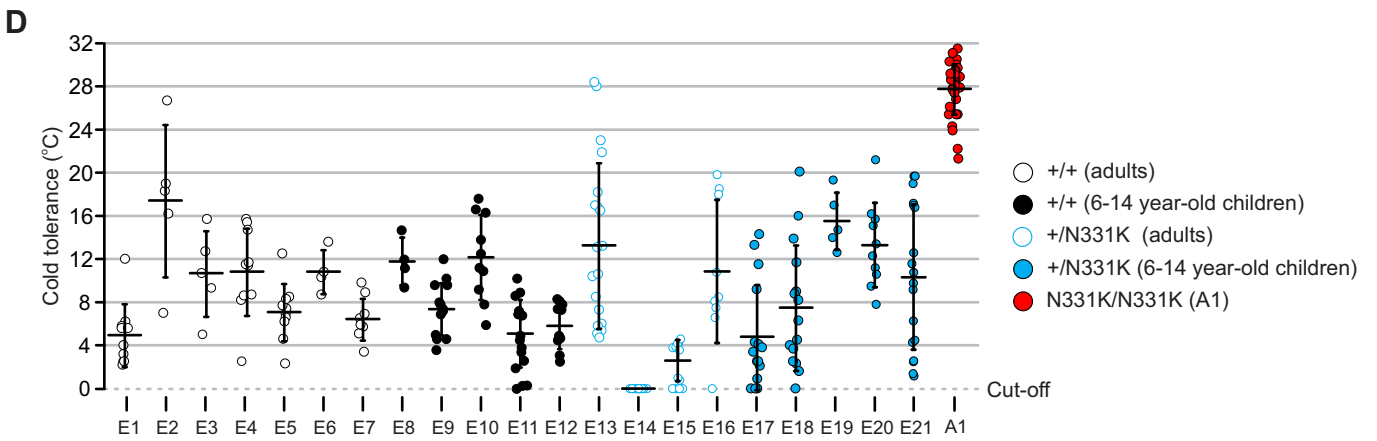

**Supplemental Figure 4: The Affected Individual (A1) demonstrates elevated heat-pain threshold and elevated cold-pain threshold compared with control groups. (A-D)** Repeated measurements of **(A)** HPT ( $n^{E1} = 37, n^{E2} = 93, n^{E3} = 73, n^{E4} = 53, n^{E5} = 38, n^{E6} = 9, n^{E7} = 14, n^{E8} = 24, n^{E9} = 25, n^{E10} = 15, n^{E11} = 15, n^{E12} = 15, n^{E13} = 30, n^{E14} = 19, n^{E15} = 10, n^{E16} = 12, n^{E17} = 13, n^{E18} = 12, n^{E19} = 10, n^{E20} = 15, n^{E21} = 13, n^{A1} = 74$ ), **(B)** HT ( $n^{E1} = 19, n^{E2} = 15, n^{E3} = 15, n^{E4} = 15, n^{E5} = 9, n^{E6} = 4, n^{E7} = 9, n^{E8} = 5, n^{E9} = 17, n^{E10} = 15, n^{E11} = 15, n^{E12} = 15, n^{E13} = 19, n^{E14} = 11, n^{E15} = 10, n^{E16} = 9, n^{E17} = 14, n^{E18} = 15, n^{E19} = 5, n^{E20} = 9, n^{E21} = 18, n^{A1} = 32$ ), **(C)** CPT ( $n^{E1} = 24, n^{E2} = 36, n^{E3} = 30, n^{E4} = 25, n^{E5} = 19, n^{E6} = 10, n^{E7} = 10, n^{E8} = 22, n^{E9} = 25, n^{E10} = 20, n^{E11} = 15, n^{E12} = 15, n^{E13} = 25, n^{E14} = 35, n^{E15} = 9, n^{E16} = 8, n^{E17} = 13, n^{E18} = 15, n^{E19} = 7, n^{E20} = 15, n^{E21} = 14, n^{A1} = 53$ ) and **(D)** CT ( $n^{E1} = 10, n^{E2} = 5, n^{E3} = 5, n^{E4} = 10, n^{E5} = 10, n^{E6} = 4, n^{E7} = 9, n^{E8} = 4, n^{E9} = 14, n^{E10} = 10, n^{E11} = 15, n^{E12} = 10, n^{E13} = 20, n^{E14} = 15, n^{E15} = 10, n^{E16} = 9, n^{E17} = 15, n^{E18} = 15, n^{E19} = 5, n^{E20} = 10, n^{E21} = 18, n^{A1} = 35$ ) from healthy volunteers (E1-E12), heterozygote family members (E13-E21) and A1. Note the scatter of the individually measured points of high temperature measurements in A1, when testing for HPT and HT, which are not observed in individuals of the control groups. (Box plot; top red lines indicate upper 75% quartile; the middle line indicates mean; error bars indicate SD). We therefore decided to compare the upper quartile of HPT and HT measurements of A1 with those of the control groups and found that it is significantly greater. However, it should be borne in mind, that this is a data-driven hypothesis and, as such, is to be interpreted with caution.  $P=0.045$ , by 1-tailed Mann-Whitney  $U$ -test.

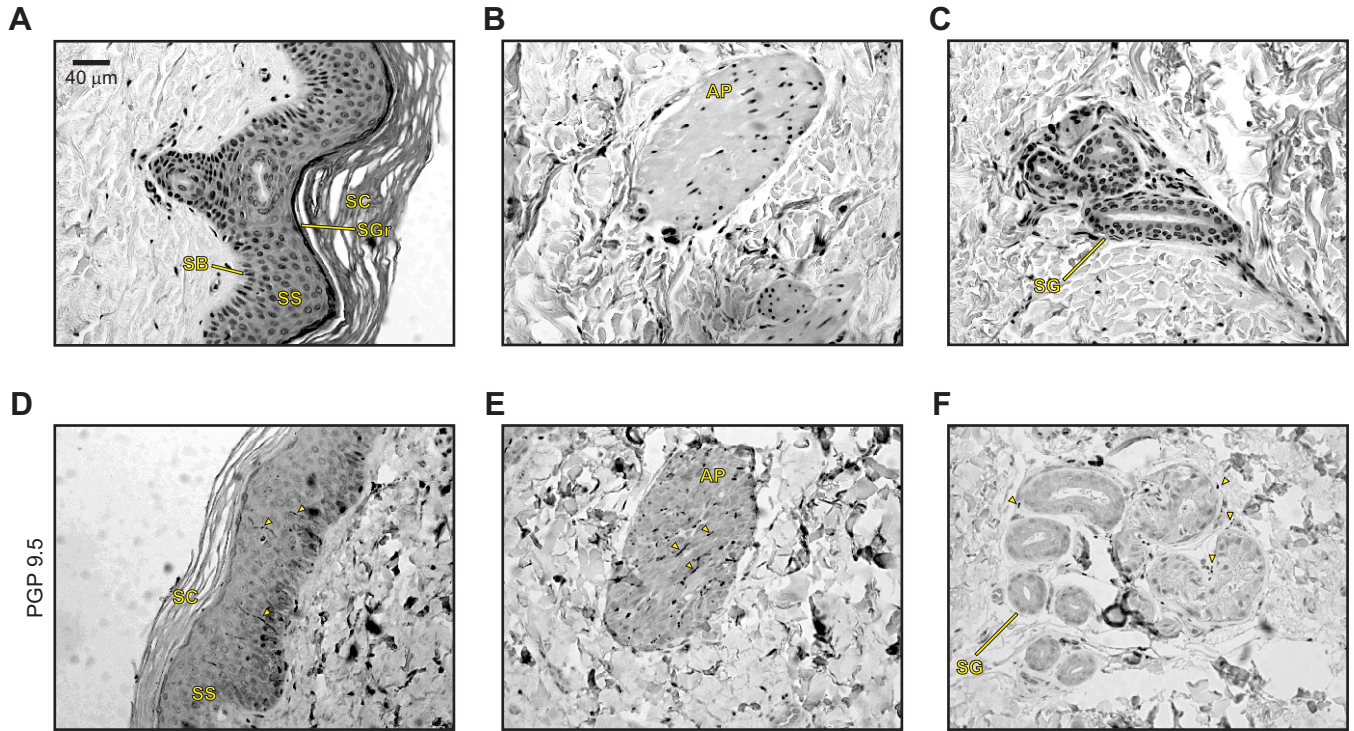

**Supplemental Figure 5: Skin biopsy of A1 shows intact small nerve fibers and normal skin structures.** Photomicrograph of thick skin section taken from a skin biopsy of A1's ankle. **(A-C)** hematoxylin staining. **(D-F)** Immuno staining using PGP9.5 antibody. **SC** - Stratum Corneum, **SS** - Stratum Spinosum, **SGr** - Stratum Granulosum, **SB** - Stratum Basale, **AP** – Arrector Pilus, **SG** - Sweat Gland. Scale bar: 40  $\mu\text{m}$  (the scale bar is applicable to all panels).



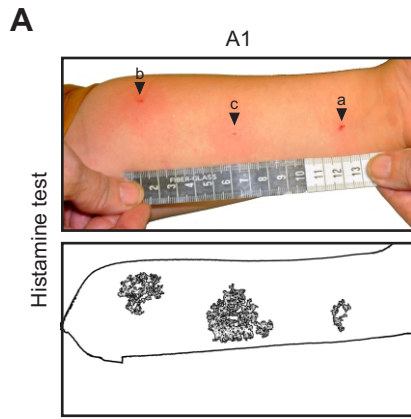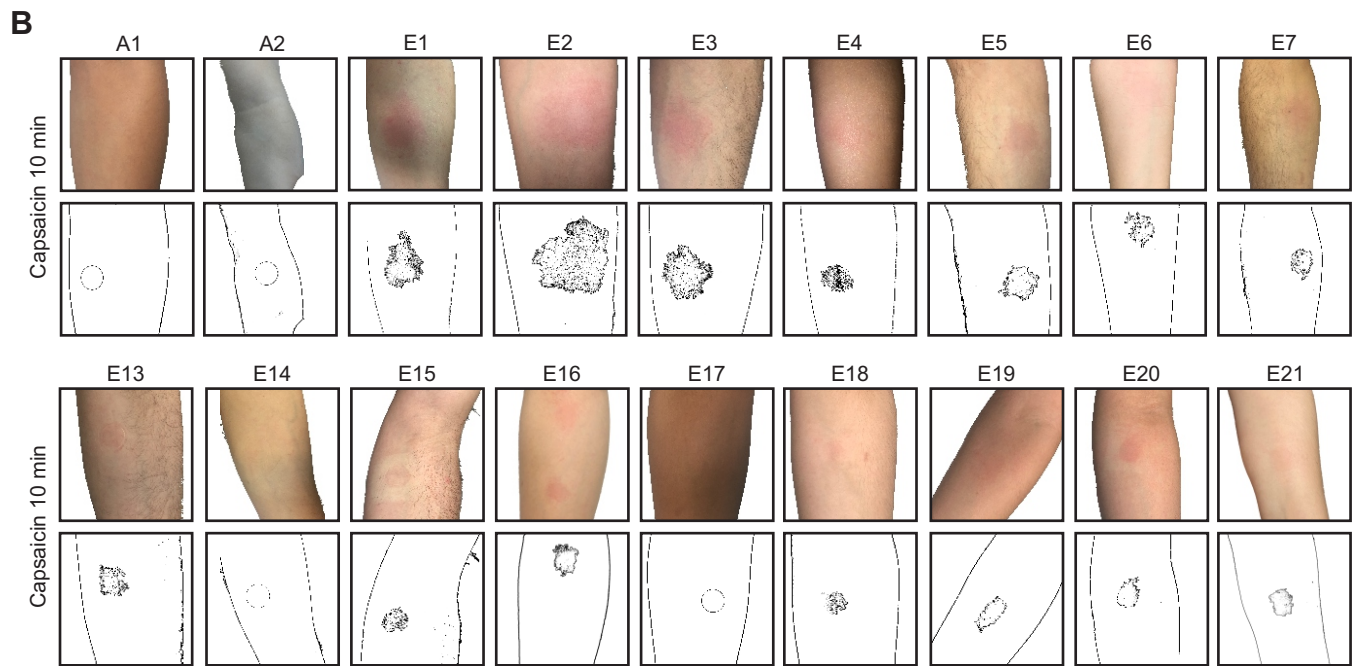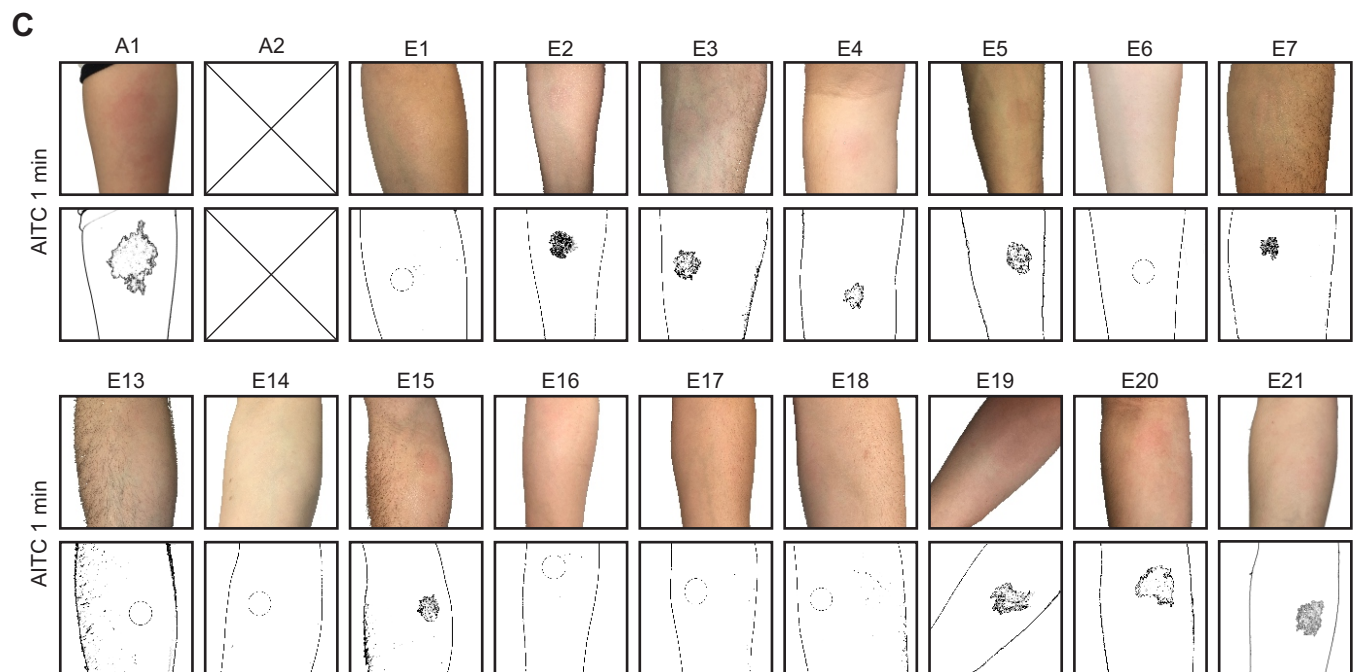

**Supplemental Figure 6: Histamine and AITC but not capsaicin induces flare responses in A1.** (A) Image of the hand of A1 after 3 injections (top): vehicle DDW (a), 1:10,000 w/v histamine (b) 1:1,000 w/v histamine (c). Images were processed (bottom) for the extent of the flare using an imaging tool for detecting areas of similar tone and color. (B) Images of individual forearms (top) from healthy volunteers (E1-E7), heterozygote family members (E13-E21) and the affected individuals (A1 and A2) after topical application of 5% capsaicin for 10 minutes using Finn chamber. Images were processed (bottom) for the extent of the flare using an imaging tool for detecting areas of similar tone and color. Note that the two affected individuals did not develop any flare, while most of the individuals in the control groups developed skin flare (14/16). (C) Images of individual forearms after topical application of 25% AITC for 1 minute. Note that A1 developed a large skin flare, while most individuals in the control groups developed a small flare (4/16) or did not develop any flare (7/16).

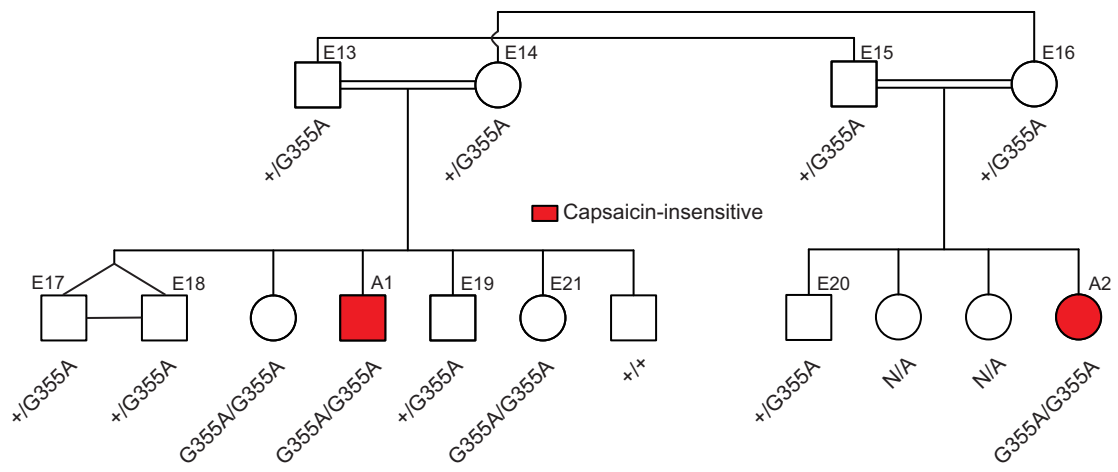

**Supplemental Figure 7: Genetic analysis of PROKR1 mutation in the extended family.**

Pedigree chart of a missense mutation in the *PROKR1* gene in the extended family. 4 family members were found to carry a homozygous *PROKR1* c.355G>A mutation. 2 of them also carry the homozygous *TRPVI* c.993C>G mutation (A1 and A2), while the others are heterozygote to the *TRPVI* c.993C>G mutation (one of them is E21).

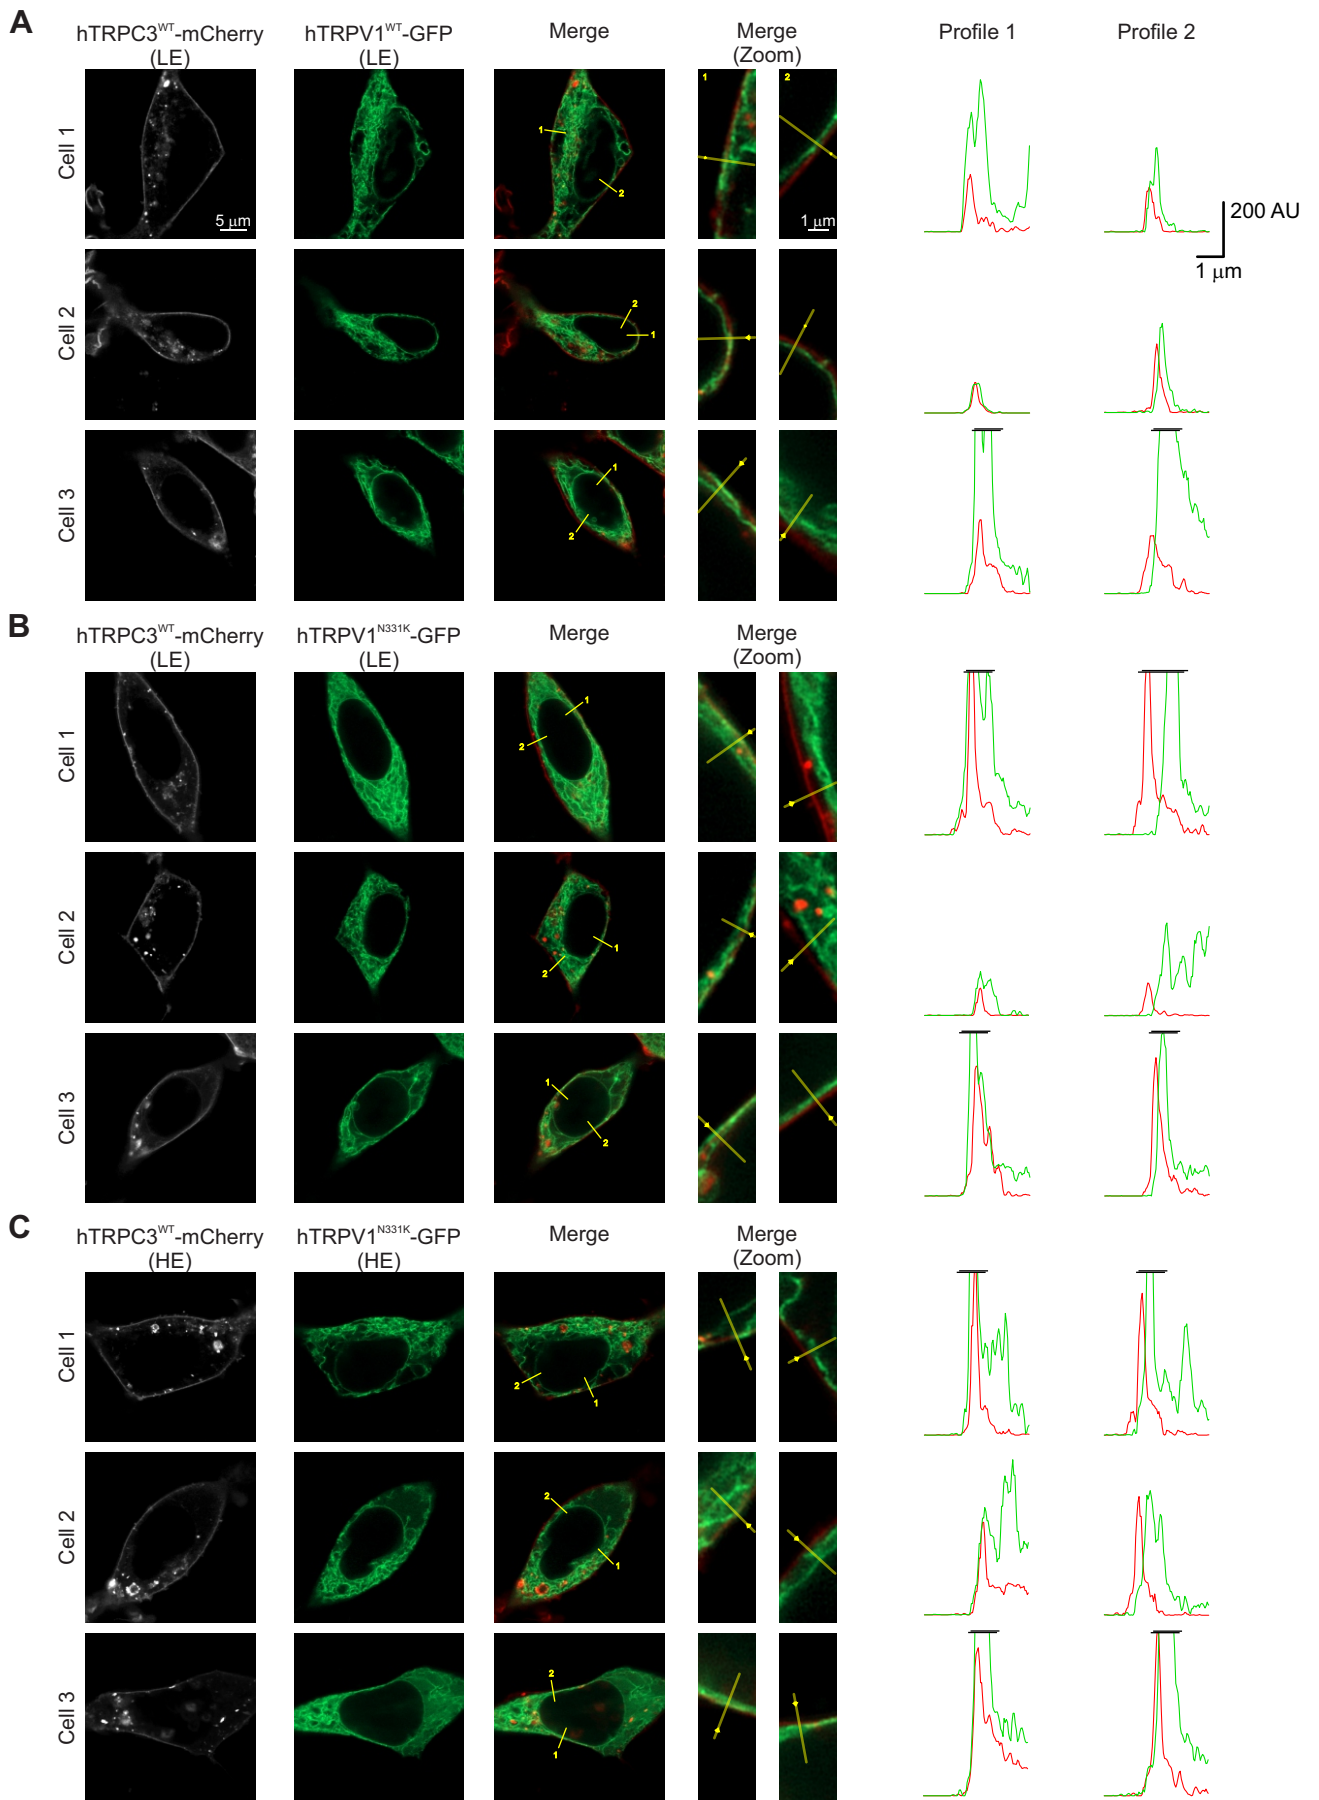

**Supplemental Figure 8: hTRPV1<sup>N331K</sup> channel reach the plasma membrane.**

Representative confocal images of naïve T-REx-293 cells co-transfected with hTRPC3<sup>WT</sup>-mCherry (red or white) together with hTRPV1<sup>WT</sup>-GFP or hTRPV1<sup>N331K</sup>-GFP (green). First column (from left to right): Confocal images of hTRPC3<sup>WT</sup>-mCherry (white). Scale bar: 5  $\mu\text{m}$  (the scale bar is applicable to the first, second and third columns). Second column: Confocal images of hTRPV1<sup>WT</sup>-GFP (green) at LE levels (**A**) and hTRPV1<sup>N331K</sup>-GFP (green) at LE levels (**B**) and at HE levels (**C**). Third column: Confocal merged images showing hTRPV1-GFP (green) and hTRPC3<sup>WT</sup>-mCherry (red). Fourth and Fifth columns: High magnification confocal merged images showing hTRPV1-GFP (green) and hTRPC3<sup>WT</sup>-mCherry (red). Scale bar: 1  $\mu\text{m}$  (the scale bar is applicable to the fourth and fifth columns). Profile graphs indicate the fluorescence intensity along the yellow lines crossing the plasma membrane in the merged images (third, fourth and fifth columns). Note that in profile 1 the GFP fluorescent signal precedes or coincides with that of the mCherry, while in profile 2 the mCherry fluorescent signal precedes or coincides with that of the GFP.

**A**

|                                |                                |     |     |
|--------------------------------|--------------------------------|-----|-----|
|                                | 320                            | 330 | 340 |
|                                | 90123456789012345678901        |     |     |
| <b>Consensus :</b>             | <b>XJXPXLKLEXJXNKKGXTPLXLA</b> |     |     |
| TRPV1 Homo sapiens :           | KLHPTLKLEELTNKKGMTPLALA        |     |     |
| TRPV1 Rattus norvegicus :      | KLHPTLKLEELITNRKGLTPLALA       |     |     |
| TRPV1 Mus musculus :           | KLHPTLKLEELTNKKGLTPLALA        |     |     |
| TRPV1 Oryctolagus cuniculus :  | KLHPTLKLEELTNKKGLTPLALA        |     |     |
| TRPV1 Scapanus orarius :       | RLHPTLKLEELTNKKGLTPLALA        |     |     |
| TRPV1 Desmodus rotundus :      | KLHPTLKLEELTNKKGLTPLALA        |     |     |
| TRPV1 Canis lupus familiaris : | KLHPTLKLEELTNKKGLTPLALA        |     |     |
| TRPV1 Tursiops truncatus :     | RLHPALKLEELTNKKGLTPLALA        |     |     |
| TRPV1 Falco cherrug :          | KINPILKLEELTNKKGLTPLALA        |     |     |
| TRPV1 Gallus gallus :          | KINPILKLEELTNKKGLTPLALA        |     |     |
| TRPV1 Pan troglodytes :        | KLHPTLKLEELTNKKGMTPLALA        |     |     |

  

|                           |                                           |     |     |
|---------------------------|-------------------------------------------|-----|-----|
|                           | 630                                       | 640 | 650 |
|                           | 89012345678901234567890                   |     |     |
| <b>Consensus :</b>        | <b>YNSLYSTCLELKF<del>F</del>TIGMGDLEF</b> |     |     |
| TRPV1 Homo sapiens :      | YNSLYSTCLELKF <del>F</del> TIGMGDLEF      |     |     |
| TRPV1 Rattus norvegicus : | YNSLYSTCLELKF <del>F</del> TIGMGDLEF      |     |     |

**B**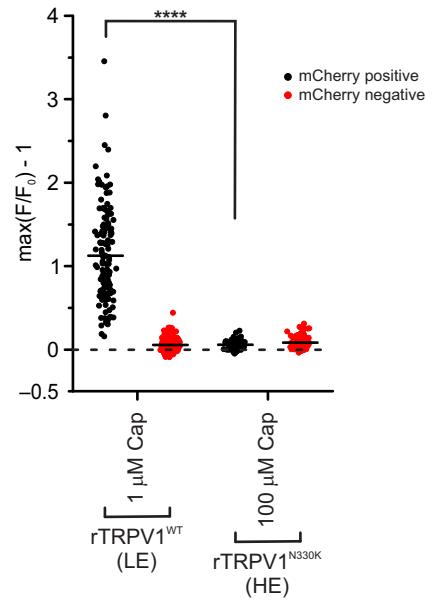**C**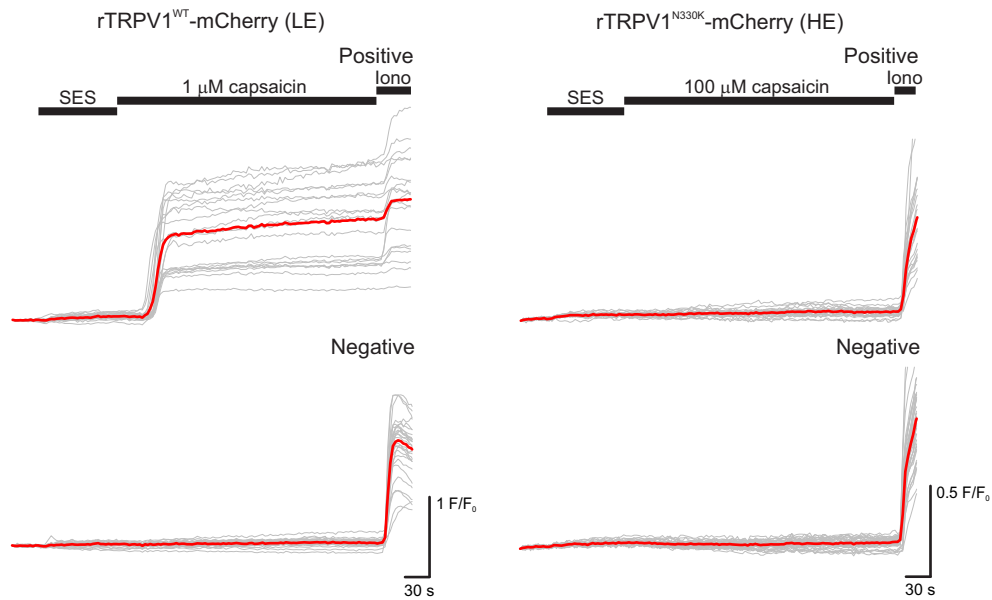

**Supplemental Figure 9: The homologous mutation N330K renders the rTRPV1 channel**

**inactive.** (A) Top: Sequence alignment of TRPV1 from several species shows the conservation of the N331 residue. Bottom: Sequence alignment of hTRPV1 and rTRPV1 show the conservation of the F641 residue. (B) Maximal (max) normalized fluorescence change from baseline during application of 1  $\mu$ M capsaicin (Cap): rTRPV1<sup>WT</sup> LE, mCherry positive, 1  $\mu$ M Cap ( $N = 7$  plates,  $n = 127$  cells), rTRPV1<sup>WT</sup> LE, mCherry negative, 1  $\mu$ M Cap ( $N = 7$ ,  $n = 191$ ) and 100  $\mu$ M capsaicin: rTRPV1<sup>N330K</sup> HE, mCherry positive, 100  $\mu$ M Cap ( $N = 5$ ,  $n = 126$ ), rTRPV1<sup>N330K</sup> HE, mCherry negative, 100  $\mu$ M Cap ( $N = 5$ ,  $n = 170$ ). \*\*\*\* $P < 0.0001$  by 2-tailed Student's  $t$ -test. (C). Representative traces of Fura-2 based  $Ca^{2+}$  imaging from T-REx-293 cells transiently transfected with rTRPV1<sup>WT</sup>-mCherry at LE levels (left) and rTRPV1<sup>N330K</sup>-mCherry at HE levels (right) in response to application of 1  $\mu$ M or 100  $\mu$ M capsaicin, respectively. Upper traces are from mCherry positive cells (Positive), lower traces are from mCherry negative cells (Negative). Application of the  $Ca^{2+}$  ionophore ionomycin (Iono) served as a positive control.



Table S1: Homozygous gene variants of A1 remaining after filtering and their occurrence in A2

| Chr | bp (Hg19) | ref | mut | GERP | AA      | Gene     | MT | ExAC        | gnomAD hom | Rs No.      | Found also in A2 |
|-----|-----------|-----|-----|------|---------|----------|----|-------------|------------|-------------|------------------|
| 1   | 176668379 | G   | A   | 4.14 | D-964-N | PAPPA2   | D  | 0.0002      |            | rs201513629 |                  |
| 1   | 179078052 | T   | A   | 5.78 | T-784-S | ABL2     | D  | 0.0031      | 3          | rs55892721  |                  |
| 1   | 179959724 | C   | G   | 5.44 | S-68-C  | CEP350   | D  | 0.0048      | 13         | rs115186595 |                  |
| 1   | 206905941 | G   | T   | 5.27 | A-361-S | MAPKAPK2 | D  | 0.0021      | 5          | rs55894011  |                  |
| 2   | 46597010  | G   | A   | 5.65 | R-275-H | EPAS1    | D  | 0.000009263 |            |             |                  |
| 2   | 54176305  | C   | T   | 3.04 | A-120-T | PSME4    | D  |             |            |             |                  |
| 2   | 68873308  | G   | A   | 5.21 | E-119-K | PROKR1   | D  | 0.00003374  |            | rs140225124 | Yes              |
| 2   | 120209611 | C   | T   | 5.33 | R-299-H | SCTR     | D  | 0.0003      | 1          | rs376021809 |                  |
| 3   | 149459466 | C   | T   | 3.6  | V-148-M | COMMD2   | D  | 0.0032      | 3          | rs148182261 |                  |
| 3   | 171431726 | C   | G   | 5.36 | E-290-Q | PLD1     | D  | 0.0017      |            | rs142070781 |                  |
| 16  | 67273254  | A   | G   | 4.85 | I-102-T | FHOD1    | D  | 0.0012      | 2          | rs138319092 |                  |
| 16  | 69748928  | C   | G   | 6.03 | R-119-P | NQO1     | D  | 0.0041      | 17         | rs11555215  |                  |
| 16  | 69760341  | A   | G   | 3.56 | M-1-T   | NQO1     | D  | 0.0042      | 20         | rs114238154 |                  |
| 17  | 3493152   | G   | C   | 2.61 | N-331-K | TRPV1    | D  | 0.000008858 |            |             | Yes              |
| 17  | 7557394   | A   | T   | 5.23 | Q-124-L | ATP1B2   | D  | 0.003       | 13         | rs34745087  |                  |
| 20  | 43533771  | C   | T   | 5.87 | T-196-M | YWHAB    | D  | 0.0002      |            | rs146766895 |                  |

**Supplemental Table 1: Homozygous gene variants of A1 remaining after filtering and their occurrence in A2.**

Summary of homozygous gene variants remaining after filtering in A1. **Chr** – Chromosome; **bp (Hg19)** - location in base pairs in human genome version 19; **ref** – reference; **mut** – mutation; **GERP**- conservation score; **Gene** – Gene symbol; **MT**- MutationTaster pathogenicity prediction (D: Disease causing – probably deleterious, N: polymorphism – probably harmless), **ExAC** - Exome Aggregation Consortium; **gnomAD hom** – number of homozygotes among the more than 125,000 exomes sequences in the Genome Aggregation Database (gnomAD); **Rs No.** - Reference SNP cluster ID.



| QST                                         | A1       | A2  | E13    | E14    | E15    | E16    | E17    | E18    | E19    | E20    | E21    |
|---------------------------------------------|----------|-----|--------|--------|--------|--------|--------|--------|--------|--------|--------|
| Warm detection threshold                    | Normal   | N/A | Normal | Normal | Normal | Normal | Normal | Normal | Normal | Normal | Normal |
| Cold detection threshold                    | Normal   | N/A | Normal | Normal | Normal | Normal | Normal | Normal | Normal | Normal | Normal |
| Cold-pain threshold                         | Abnormal | N/A | Normal | Normal | Normal | Normal | Normal | Normal | Normal | Normal | Normal |
| Heat-pain threshold                         | Abnormal | N/A | Normal | Normal | Normal | Normal | Normal | Normal | Normal | Normal | Normal |
| Mechanical detection threshold              | Normal   | N/A | Normal | Normal | Normal | Normal | Normal | Normal | Normal | Normal | Normal |
| Mechanical-pain threshold                   | Normal   | N/A | Normal | Normal | Normal | Normal | Normal | Normal | Normal | Normal | Normal |
| Cold tolerance (thermode)                   | Abnormal | N/A | Normal | Normal | Normal | Normal | Normal | Normal | Normal | Normal | Normal |
| Cold tolerance (cold pressor)               | Normal   | N/A | Normal | Normal | Normal | Normal | Normal | Normal | Normal | Normal | Normal |
| Heat tolerance                              | Abnormal | N/A | Normal | Normal | Normal | Normal | Normal | Normal | Normal | Normal | Normal |
| QST following topical capsaicin application | Abnormal | N/A | Normal | Normal | Normal | Normal | Normal | Normal | Normal | Normal | Normal |
| QST following topical AITC application      | Normal   | N/A | Normal | Normal | Normal | Normal | Normal | Normal | Normal | Normal | Normal |

| Somatic and Visceral Pain:                                                    |                                                 |     |                |                             |         |                              |                                                 |                              |                              |     |                              |
|-------------------------------------------------------------------------------|-------------------------------------------------|-----|----------------|-----------------------------|---------|------------------------------|-------------------------------------------------|------------------------------|------------------------------|-----|------------------------------|
| Fractures:                                                                    | A1                                              | A2  | E13            | E14                         | E15     | E16                          | E17                                             | E18                          | E19                          | E20 | E21                          |
| Did you get bone fractures? Where?                                            | Y (hand and leg)                                | N   | Y (right hand) | N                           | Y (leg) | N                            | N                                               | N                            | N                            | N   | N                            |
| Did you feel pain                                                             | Y                                               | N/A | Y              | N/A                         | Y       | N/A                          | N/A                                             | N/A                          | N/A                          | N/A | N/A                          |
| Did the fractured area was more sensitive to touch (Mechanical Hyperalgesia)? | Y                                               | N/A | Y              | N/A                         | Y       | N/A                          | N/A                                             | N/A                          | N/A                          | N/A | N/A                          |
| Burns:                                                                        |                                                 |     |                |                             |         |                              |                                                 |                              |                              |     |                              |
| Did you get burnt?                                                            | Y                                               | N   | Y              | Y                           | N       | Y                            | Y                                               | Y                            | Y                            | Y   | Y                            |
| Do you get burnt frequently?                                                  | N                                               | N   | N              | N                           | N       | N                            | N                                               | N                            | N                            | N   | N                            |
| Did you feel pain at the burnt area?                                          | Y                                               | N/A | Y              | Y                           | N/A     | Y                            | Y                                               | Y                            | Y                            | Y   | Y                            |
| Did the burnt area was more sensitive to touch and hot water (Hyperalgesia)?  | Y                                               | N/A | Y              | Y                           | N/A     | Y                            | Y                                               | Y                            | Y                            | Y   | Y                            |
| General                                                                       |                                                 |     |                |                             |         |                              |                                                 |                              |                              |     |                              |
| Did you feel pain inside your body (visceral pain)                            | Y                                               | Y*  | Y              | Y                           | Y       | Y                            | Y                                               | Y                            | Y                            | Y   | Y                            |
| Did you have heartburns?                                                      | Y                                               | N/A | Y              | Y                           | Y       | Y                            | Y (due to excessive consumption of soft drinks) | Y                            | N/A                          | Y   | N/A                          |
| Did you have abdominal pressure?                                              | N                                               | Y*  | N              | N                           | Y       | N                            | Y                                               | Y (high frequency)           | Y                            | N   | N                            |
| Did you feel stomach pain?                                                    | Y                                               | Y*  | Y              | Y                           | Y       | Y                            | Y                                               | Y                            | Y                            | Y   | Y                            |
| Did you have ulcers?                                                          | Y                                               | N   | N              | N                           | N       | N                            | N                                               | N                            | N                            | N   | N                            |
| Did you have hemorrhoids?                                                     | N                                               | N   | N              | N                           | N       | N                            | N                                               | N                            | N                            | N   | N                            |
| Did you have muscle pain?                                                     | Y                                               | N/A | Y              | Y                           | N       | Y                            | N                                               | N                            | N                            | Y   | N                            |
| Did you have joint pain (General, fingers, thigh, knees, ankle)?              | Y (ankle)                                       | N/A | Y (knee)       | Y (fingers, thigh and knee) | Y       | N                            | N                                               | N                            | N                            | N   | N                            |
| Did you have a headache?                                                      | Y                                               | N/A | Y              | Y                           | Y       | Y                            | N                                               | N                            | Y                            | Y   | Y                            |
| Did you have migraine?                                                        | N                                               | N/A | N              | N                           | Y       | N                            | N                                               | N                            | N                            | N   | N                            |
| Did you feel tooth pain?                                                      | Y                                               | N/A | Y              | Y                           | Y       | Y                            | Y                                               | Y                            | Y                            | Y   | Y                            |
| Did you feel tooth pain when drinking cold beverages?                         | Y                                               | N/A | Y              | Y                           | N       | Y                            | Y                                               | Y                            | Y                            | Y   | Y                            |
| Did you have urinary infection?                                               | Y (at least once <sup>4</sup> )                 | N   | N              | Y (sometimes)               | N       | Y (once)                     | Y (twice)                                       | Y (3 times)                  | Y (twice)                    | N   | Y                            |
| Did you feel pain while urinating?                                            | N (even during urinary infection <sup>4</sup> ) | N   | N              | Y (sometimes)               | N       | Y (during urinary infection) | Y (during urinary infection)                    | Y (during urinary infection) | Y (during urinary infection) | N   | Y (during urinary infection) |

<sup>4</sup> – The symptoms were (according to the parent report): dark and red urine color, high fever and pain at the flank. The family physician diagnosed it as urinary infection and prescribed antibiotics (ceftriaxone). No urinary culture was made. The treatment with ceftriaxone was effective. No pain while urinating was reported during the period of the disease.







| ROS – Review of systems                                                                                                                                                                                                                                                                                                                                                                                                       | A1                                            | A2                          | E13                                                                          | E14                            | E15 | E16                           | E17                                 | E18                                 | E19                                           | E20                                                  | E21 |
|-------------------------------------------------------------------------------------------------------------------------------------------------------------------------------------------------------------------------------------------------------------------------------------------------------------------------------------------------------------------------------------------------------------------------------|-----------------------------------------------|-----------------------------|------------------------------------------------------------------------------|--------------------------------|-----|-------------------------------|-------------------------------------|-------------------------------------|-----------------------------------------------|------------------------------------------------------|-----|
| Do you suffer from any disease, weight loss, night sweating, tiredness, itching, rash, fever?                                                                                                                                                                                                                                                                                                                                 | Y<br>(Extensive sweating)                     | N<br>(Normal-mild sweating) | N                                                                            | N                              | N   | N                             | N                                   | N                                   | N                                             | N                                                    | N   |
| <b>Eye:</b> visual changes, headache, eye pain, double vision, scotomas (blind spots), floaters or "feeling like a curtain got pulled down" (retinal hemorrhage vs amaurosis fugax)                                                                                                                                                                                                                                           | N                                             | N                           | N                                                                            | N                              | N   | Y<br>Strabismus,<br>Headaches | N                                   | N                                   | N                                             | N                                                    | N   |
| <b>Ears, nose, mouth, and throat (ENT):</b> Runny nose, frequent nose bleeds (epistaxis), sinus pain, stuffy ears, ear pain, ringing in ears (tinnitus), gingival bleeding, toothache, sore throat, pain with swallowing (odynophagia)                                                                                                                                                                                        | N                                             | N                           | N                                                                            | N                              | N   | N<br>Ear infection            | N                                   | N                                   | N                                             | N<br>Frequent Pharyngitis (prior to tonsils removal) | N   |
| <b>Cardiovascular:</b> chest pain, shortness of breath, exercise intolerance, PND, orthopnoea, oedema, palpitations, faintness, loss of consciousness, claudication                                                                                                                                                                                                                                                           | Y (shortness of breath, exercise intolerance) | N                           | Y (shortness of breath)                                                      | faintness                      | N   | N                             | Y (shortness of breath, chest pain) | Y (shortness of breath, chest pain) | Y (shortness of breath, exercise intolerance) | N                                                    | N   |
| <b>Respiratory:</b> cough, sputum, wheeze, haemoptysis, shortness of breath, exercise intolerance, asthma                                                                                                                                                                                                                                                                                                                     | Y (shortness of breath, exercise intolerance) | N                           | Y (cough, sputum, wheeze, shortness of breath, exercise intolerance, asthma) | N                              | N   | N                             | Y (shortness of breath)             | Y (shortness of breath)             | Y (shortness of breath, exercise intolerance) | Y (wheeze)                                           | N   |
| <b>Gastrointestinal:</b> abdominal pain, unintentional weight loss, difficulty swallowing (solids vs liquids), indigestion, bloating, cramping, anorexia, food avoidance, nausea/vomiting, diarrhea/constipation, inability to pass gas (obstipation), vomiting blood (haematemesis), bright red blood per rectum (BRBPR, hematochezia), foul smelling dark black tarry stools (melaena), dry heaves of the bowels (tenesmus) | N                                             | N                           | N                                                                            | N                              | N   | N                             | N                                   | N                                   | N                                             | N                                                    | N   |
| <b>Genitourinary:</b> Urinary: Irritative vs Obstructive symptoms: Micturition – incontinence, dysuria, haematuria, nocturia, polyuria, hesitancy, terminal dribbling, decreased force of stream                                                                                                                                                                                                                              | Y                                             | N                           | N                                                                            | N                              | N   | N                             | N                                   | N                                   | N                                             | Y (rarely nocturnal enuresis)                        | N   |
| <b>Musculoskeletal:</b> pain, misalignment, stiffness (morning vs day long; improves/worsens with activity), joint swelling, decreased range of motion, crepitus, functional deficit, arthritis                                                                                                                                                                                                                               | Y (pain in ankles)                            | N                           | N                                                                            | N                              | N   | N                             | N                                   | N                                   | N                                             | Y (bone pain at the leg)                             | N   |
| <b>Integumentary:</b> pruritus, rashes, stria, lesions, wounds, incisions, acanthosis nigricans, nodules, tumors, eczema, excessive dryness and/or discoloration. Breast pain, soreness, lumps, or discharge.                                                                                                                                                                                                                 | N                                             | N                           | N                                                                            | Y (breast tumor non-malignant) | N   | N                             | N                                   | N                                   | N                                             | N                                                    | N   |

| Hematology:                         | A1               | E17              |
|-------------------------------------|------------------|------------------|
| [CD3+] % Lymphocytes (Number)       | 68.67<br>(7,289) | 71.92<br>(7,620) |
| [TCRgd] % Lymphocytes (Number)      | 13.03<br>(950)   | 8.49<br>(647)    |
| [CD4+] % TCRαβ (Number)             | 64.96<br>(4,129) | 62.13<br>(4,337) |
| [CD8+] % TCRαβ (Number)             | 32.61<br>(2,073) | 35.54<br>(2,481) |
| [DNTcells] % TCRαβ (Number)         | 1.89<br>(120)    | 1.95<br>(136)    |
| [CD19+] % Lymphocytes (Number)      | 14.04<br>(1,490) | 17.37<br>(1,840) |
| [CD56+CD16+] % Lymphocytes (Number) | 6.73<br>(714)    | 0.44<br>(47)     |



**Supplemental Table 2: Anamnesis, Past medical History and Hematological examination.**

A table summarizing medical examination, clinical tests, anamnesis, past medical history and structured medical interview of the heterozygous family members (E13-21, +/N331K) and the 2 affected individuals (A1 and A2, N331K/N331K), which covers a wide variety of health conditions (Y - yes; N - no; N/A - not available, abnormalities are highlighted in red).
